# Supplementary material for: Functionalized nitronyl nitroxide biradical bridged one-dimensional lanthanide chains: slow magnetic relaxation in the Tb and Dy analogues
Source: Royal Society of Chemistry journal article supplement (doi:10.1039/c7nj02006f), 2017-01-01
Supplement: c7nj02006f1.pdf [file c7nj02006f1.pdf]

## Supporting Information

### Functionalized nitronyl nitroxide biradical bridged one-dimensional lanthanide chains: slow magnetic relaxation in the Tb and Dy analogues

Hongdao Li, Juan Sun, Meng Yang, Zan Sun, Jing Xie, Yue Ma, Licun Li\*

*Department of Chemistry, Key Laboratory of Advanced Energy Materials Chemistry and Tianjin Key Laboratory of Metal and Molecule-based Material Chemistry, Nankai University, Tianjin 300071, China*

Table S1 Selected bond lengths [Å] and angles [°] for complexes **1** and **2**.

| <b>1 Gd</b>     |          | <b>2 Tb</b>     |           |
|-----------------|----------|-----------------|-----------|
| Gd(1)-O(6)      | 2.354(2) | Tb(1)-O(6)      | 2.353(4)  |
| Gd(1)-O(1)      | 2.369(3) | Tb(1)-O(1)      | 2.339(4)  |
| Gd(1)-O(2)      | 2.372(3) | Tb(1)-O(2)      | 2.364(4)  |
| Gd(1)-O(3)      | 2.376(3) | Tb(1)-O(3)      | 2.352(5)  |
| Gd(1)-O(4)      | 2.376(3) | Tb(1)-O(4)      | 2.349(4)  |
| Gd(1)-O(5)      | 2.380(3) | Tb(1)-O(5)      | 2.349(4)  |
| Gd(1)-O(7)      | 2.406(3) | Tb(1)-O(7)      | 2.400(4)  |
| Gd(1)-N(1)      | 2.524(3) | Tb(1)-N(1)      | 2.515(5)  |
| N(5)-O(7)       | 1.293(4) | N(5)-O(7)       | 1.293(6)  |
| N(6)-O(8)       | 1.271(4) | N(6)-O(8)       | 1.269(7)  |
| N(3)-O(9)       | 1.190(9) | N(3)-O(9)       | 1.249(1)  |
| N(4)-O(10)      | 1.214(7) | N(4)-O(10)      | 1.219(10) |
| O(1)-Gd(1)-O(2) | 70.74(9) | O(1)-Tb(1)-O(2) | 74.06(15) |
| O(3)-Gd(1)-O(4) | 73.09(9) | O(3)-Tb(1)-O(4) | 70.84(16) |
| O(6)-Gd(1)-O(5) | 74.06(9) | O(6)-Tb(1)-O(5) | 73.31(15) |
| O(7)-Gd(1)-N(1) | 98.07(9) | O(7)-Tb(1)-N(1) | 98.36(16) |
| N(5)-O(7)-Gd(1) | 136.4(2) | N(5)-O(7)-Tb(1) | 136.6(4)  |

Table S2 Selected bond lengths [Å] and angles [°] for complexes **3** and **4**.

| <b>3 Dy</b> |          | <b>4 Nd</b> |          |
|-------------|----------|-------------|----------|
| Dy(1)-O(6)  | 2.347(3) | Nd(1)-O(6)  | 2.419(3) |
| Dy(1)-O(1)  | 2.335(3) | Nd(1)-O(1)  | 2.426(3) |
| Dy(1)-O(2)  | 2.344(3) | Nd(1)-O(2)  | 2.419(3) |
| Dy(1)-O(3)  | 2.347(3) | Nd(1)-O(3)  | 2.423(3) |
| Dy(1)-O(4)  | 2.346(3) | Nd(1)-O(4)  | 2.428(3) |

|                 |           |                   |           |
|-----------------|-----------|-------------------|-----------|
| Dy(1)-O(5)      | 2.332(3)  | Nd(1)-O(5)        | 2.404(3)  |
| Dy(1)-O(7)      | 2.392(3)  | Nd(1)-O(7)        | 2.467(3)  |
| Dy(1)-N(1)      | 2.503(4)  | Nd(1)-N(1)#1      | 2.577(4)  |
| N(5)-O(7)       | 1.295(4)  | N(5)-O(7)         | 1.289(4)  |
| N(6)-O(8)       | 1.262(5)  | N(6)-O(8)         | 1.258(5)  |
| N(3)-O(9)       | 1.222(1)  | N(3)-O(9)         | 1.386(11) |
| N(4)-O(10)      | 1.233(7)  | N(4)-O(10)        | 1.318(11) |
| O(1)-Dy(1)-O(2) | 71.18(11) | O(1)-Nd(1)-O(2)   | 69.55(11) |
| O(3)-Dy(1)-O(4) | 73.70(11) | O(3)-Nd(1)-O(4)   | 71.63(11) |
| O(6)-Dy(1)-O(5) | 74.28(11) | O(6)-Nd(1)-O(5)   | 72.66(11) |
| O(7)-Dy(1)-N(1) | 98.30(11) | O(7)-Nd(1)-N(1)#1 | 97.58(11) |
| N(5)-O(7)-Dy(1) | 136.8(3)  | N(5)-O(7)-Nd(1)   | 136.9(3)  |

Symmetry transformations used to generate equivalent atoms: #1  $x, -y + 1/2, z + 1/2$  for 4

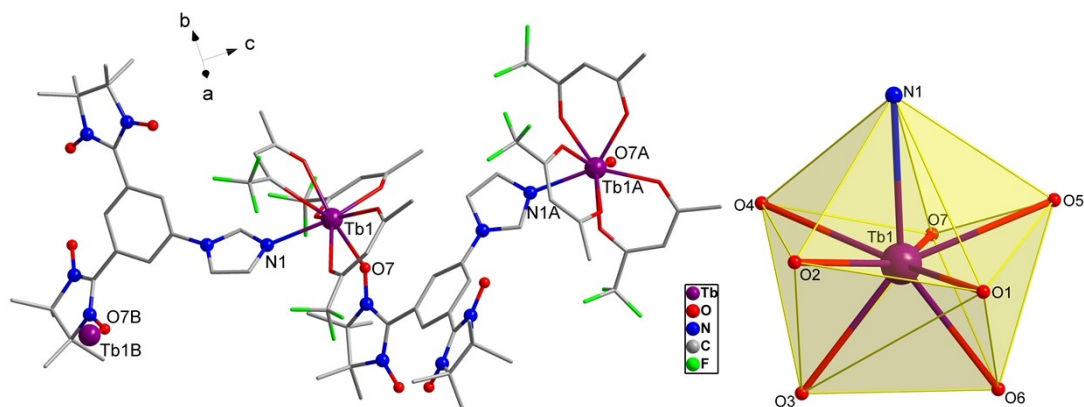

**Figure S1** (left) Crystal structure of complex **2** with the atom-labeling. All of the hydrogen and dichloromethane solvent molecules are omitted for clarity. (right) The coordination polyhedron of the Tb ion.

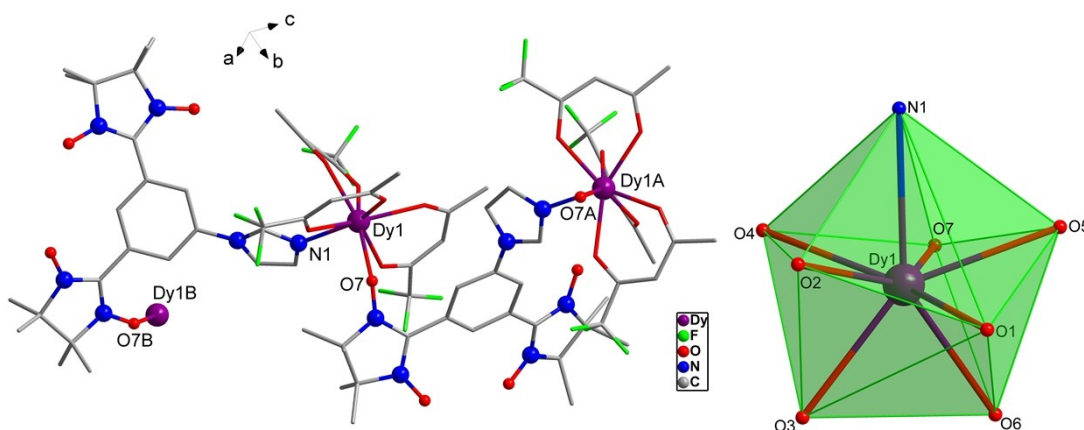

**Figure S2** (left) Crystal structure of complex **3** with the atom-labeling. All of the hydrogen and dichloromethane solvent molecules are omitted for clarity. (right) The coordination polyhedron of the Dy ion.

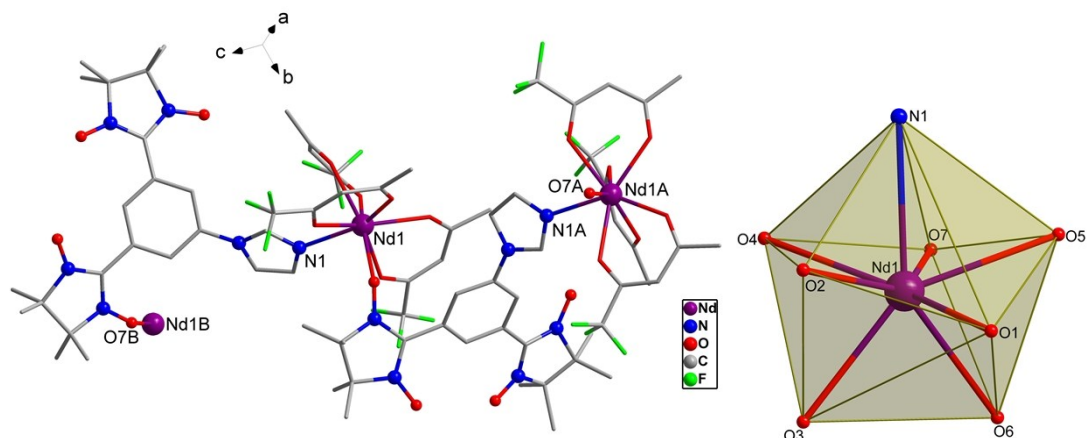

**Figure S3** (left) Crystal structure of complex **4** with the atom-labeling. All of the hydrogen and dichloromethane solvent molecules are omitted for clarity. (right) The coordination polyhedron of the Nd ion.

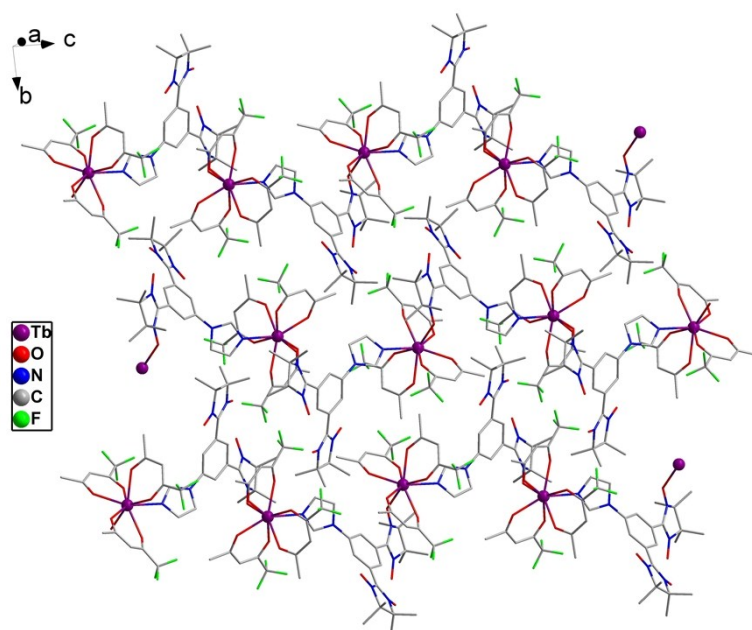

**Figure S4** Packing of the chains in crystal for complex **2**. All of the hydrogen atoms and dichloromethane solvent molecules are omitted for clarity.

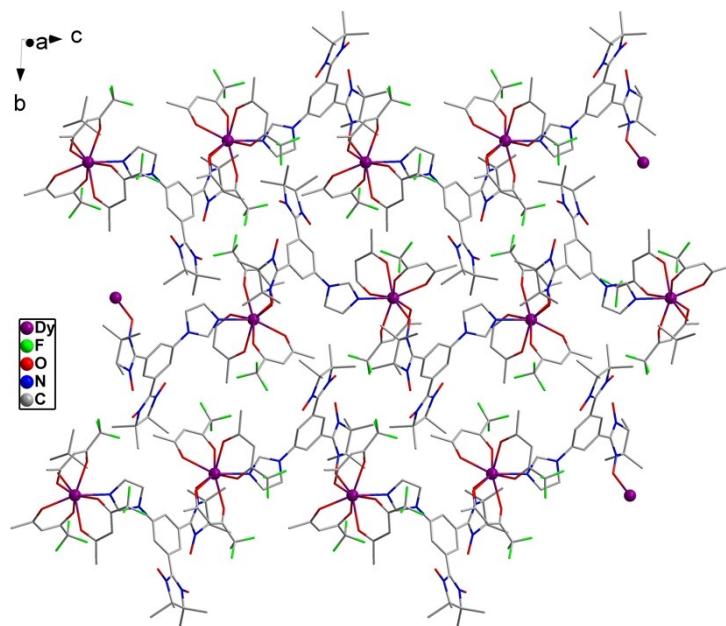

**Figure S5** Packing of the chains in crystal for complex **3**. All of the hydrogen atoms and dichloromethane solvent molecules are omitted for clarity.

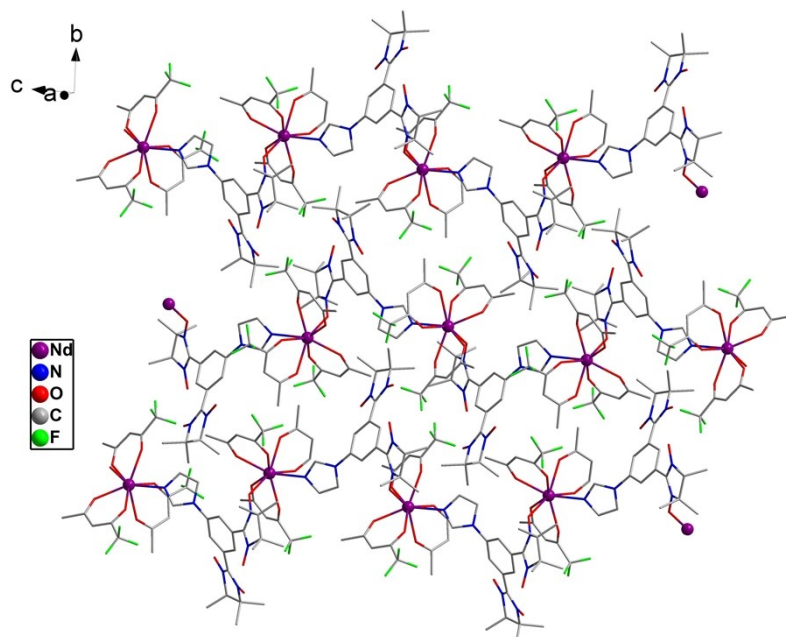

**Figure S6** Packing of the chains in crystal for complex **4**. All of the hydrogen atoms and dichloromethane solvent molecules are omitted for clarity.

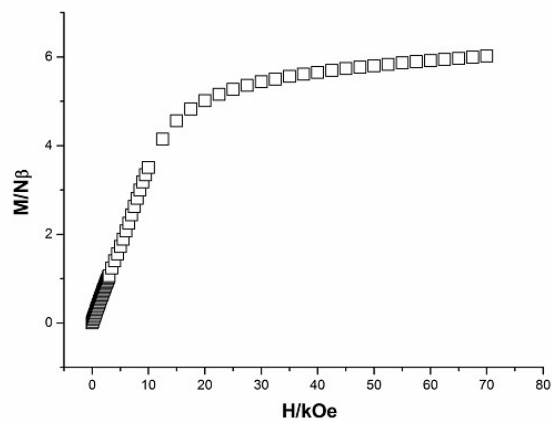

**Figure S7**  $M$  versus  $H$  plot of complex **2** at 2.0K.

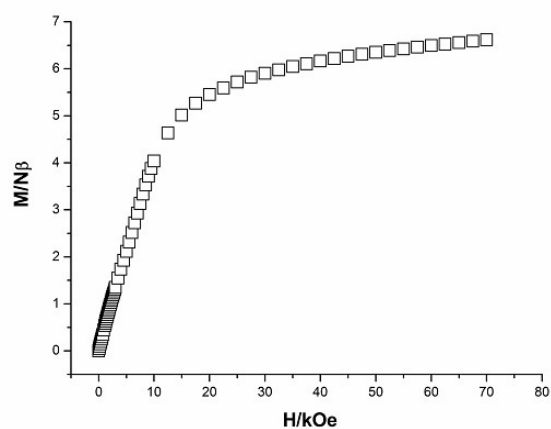

**Figure S8**  $M$  versus  $H$  plot of complex **3** at 2.0K.

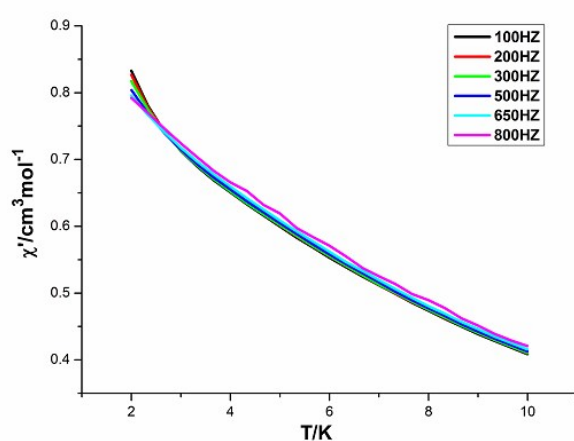

**Figure S9** Temperature dependence of the in-phase of the ac magnetic susceptibilities for **2** in zero dc field with an oscillation of 3 Oe.

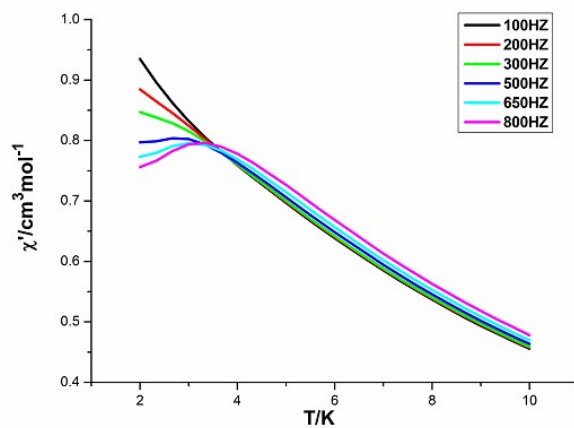

**Figure S10** Temperature dependence of the in-phase of the ac magnetic susceptibilities for **3** in zero dc field with an oscillation of 3 Oe.

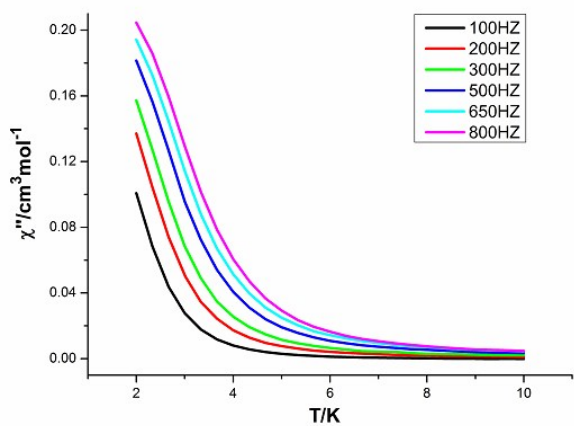

**Figure S11** Temperature dependence of the out-of-phase of the ac magnetic susceptibilities for **3** in zero dc field with an oscillation of 3 Oe.

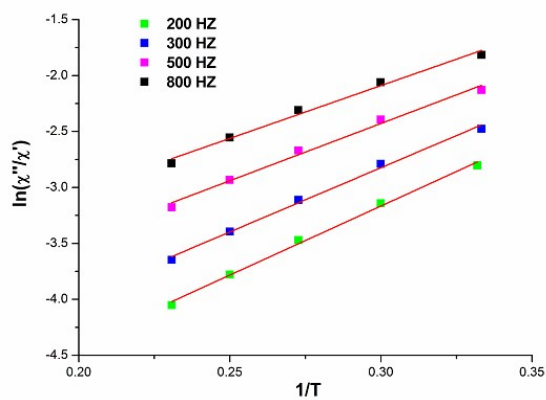

**Figure S12** Natural logarithm of  $\chi''/\chi'$  versus  $1/T$  of **3** (the solid lines represent the fitting results).
